# Supplementary material for: FOXP3 recognizes microsatellites and bridges DNA through multimerization
Source: PubMed Central journal article supplement (PMC10719092; doi:10.1038/s41586-023-06793-z), 2023-11-29
Supplement: 41586_2023_6793_MOESM1_ESM.pdf [file 41586_2023_6793_MOESM1_ESM.pdf]

---

**Supplementary information**

---

**FOXP3 recognizes microsatellites and bridges DNA through multimerization**

---

In the format provided by the authors and unedited

# Supplementary Figure 1

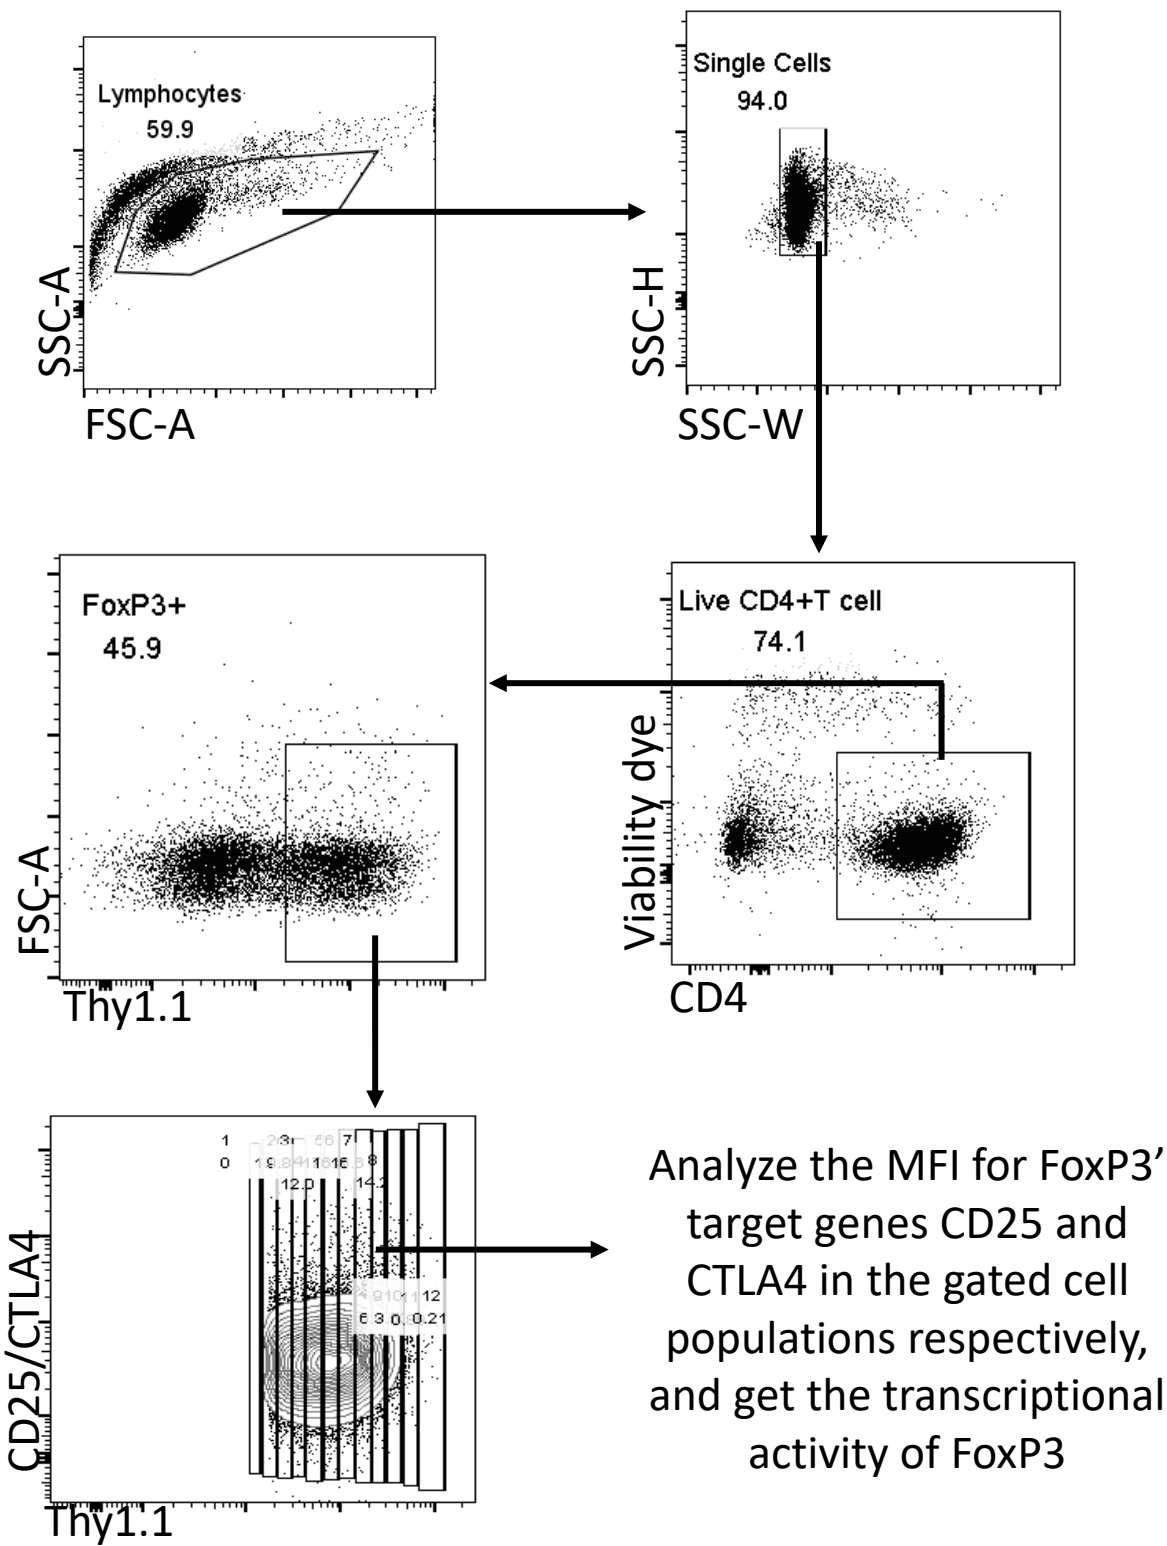

Analyze the MFI for FoxP3' target genes CD25 and CTLA4 in the gated cell populations respectively, and get the transcriptional activity of FoxP3

Gating strategies for FACS analysis

# Supplementary Figure 2

## For Figure 1

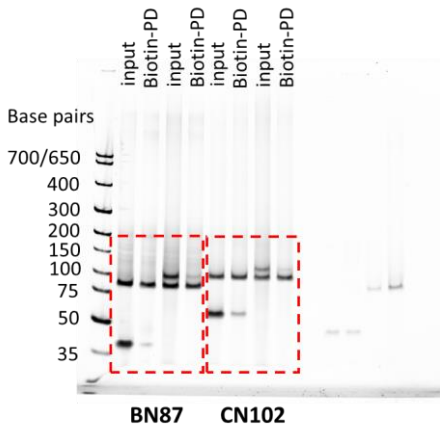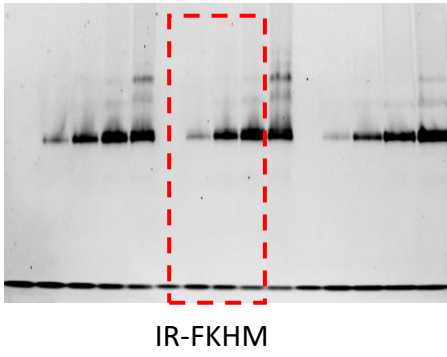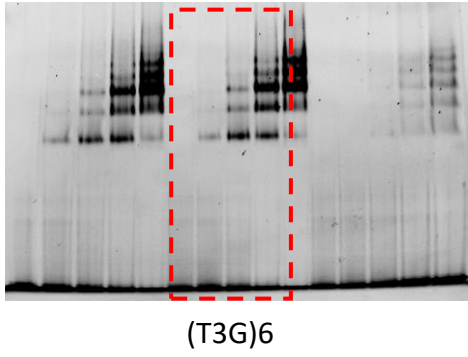

IR-FKHM

(T3G)6

Used in Figure 1i

Used in Figure 1c. Right panel.

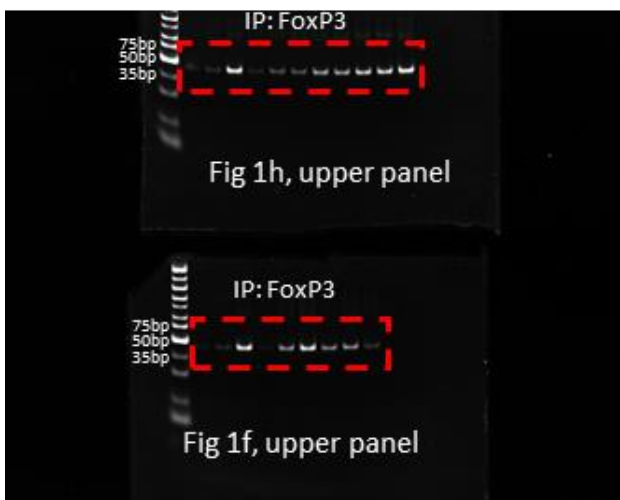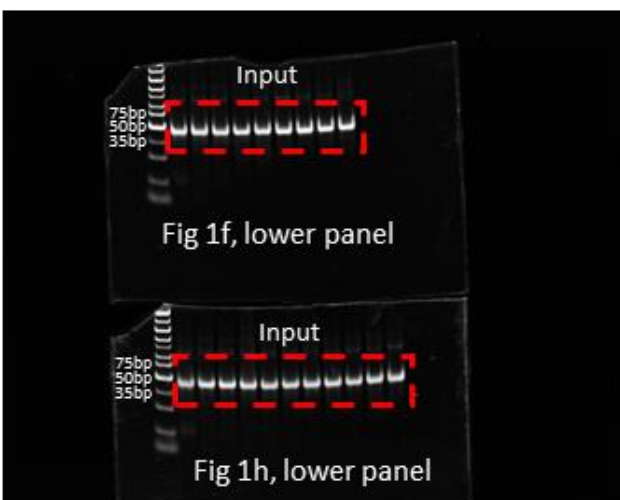

Used in Figure 1f and 1h

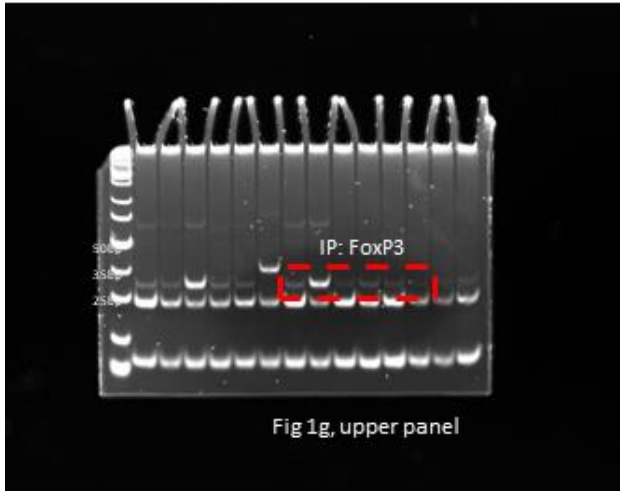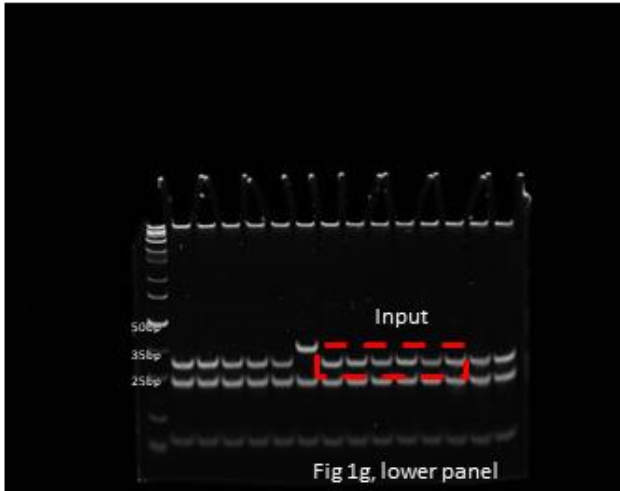

Used in Figure 1g

# For Figure 2 and Figure 3

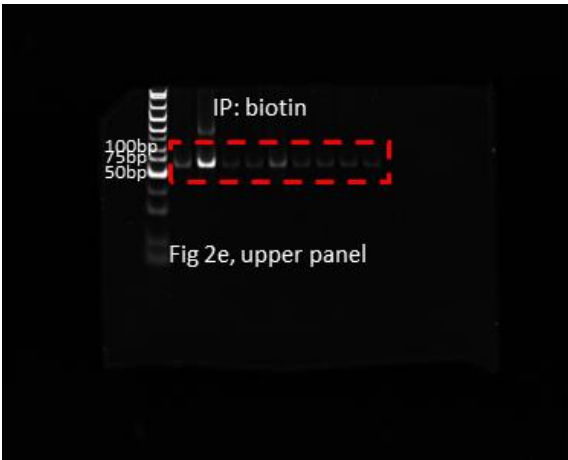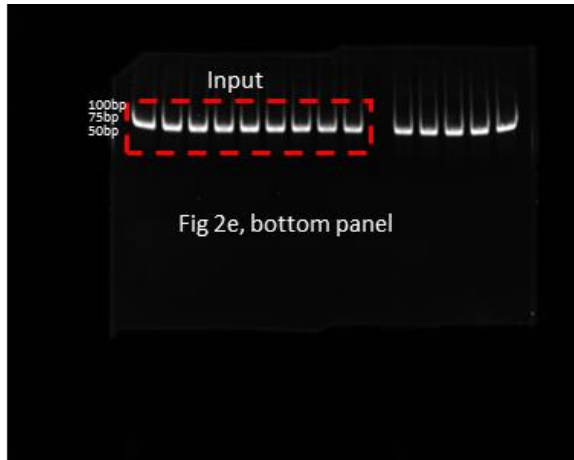

Used in Figure 2e

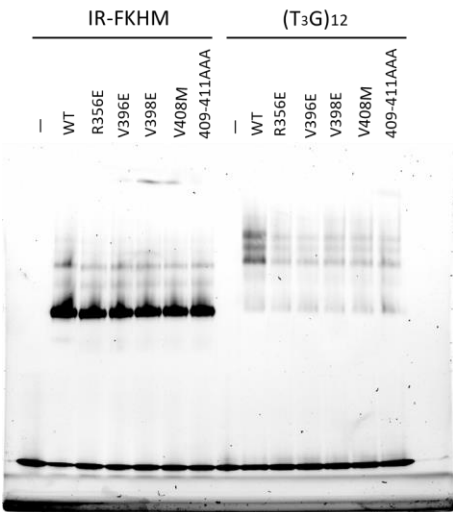

Used in Figure 3b

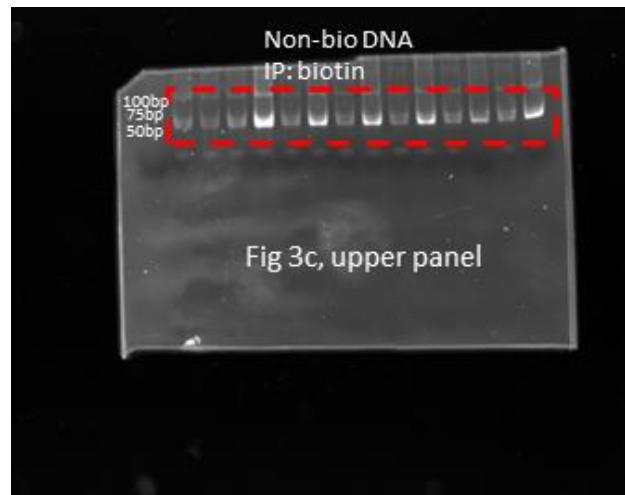

Used in Figure 3c, upper panel

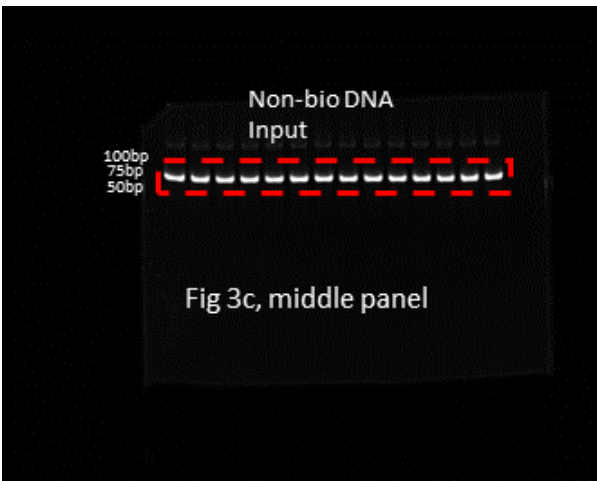

Used in Figure 3c, middle panel

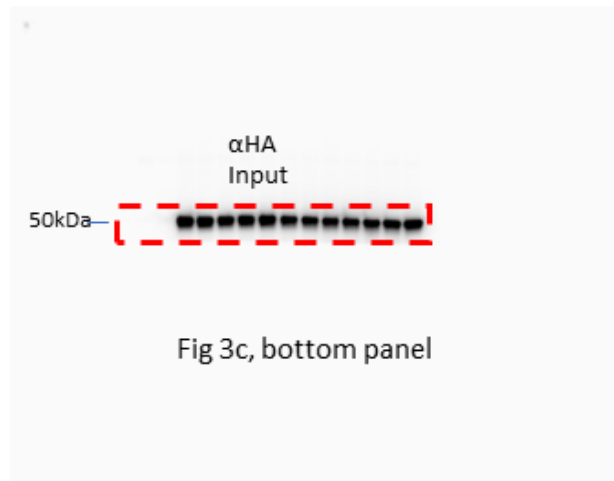

Used in Figure 3c, bottom panel

For Figure 4

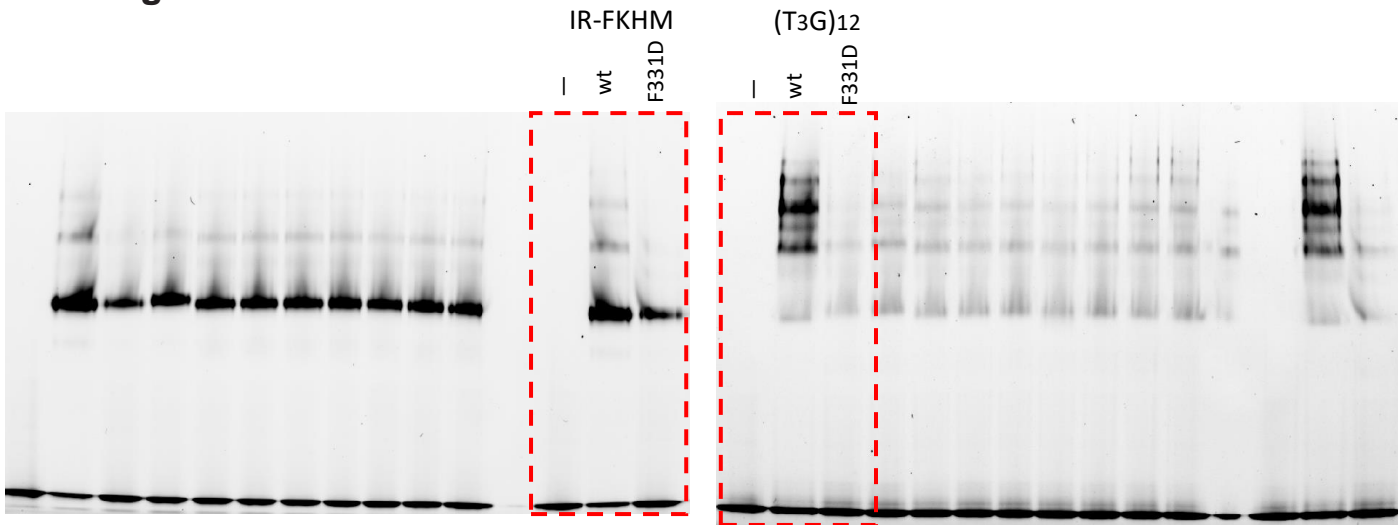

Used in Figure 4b

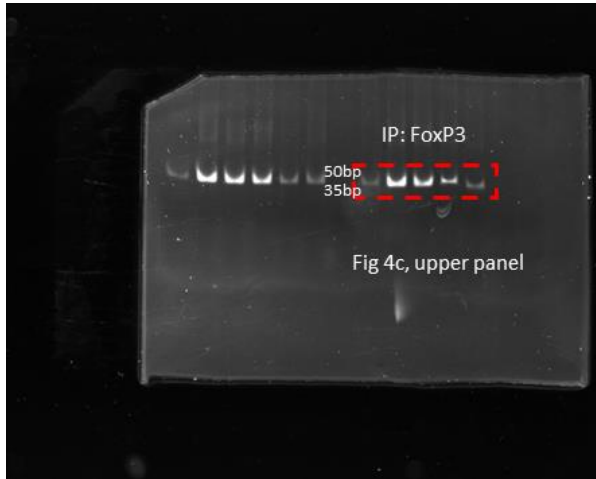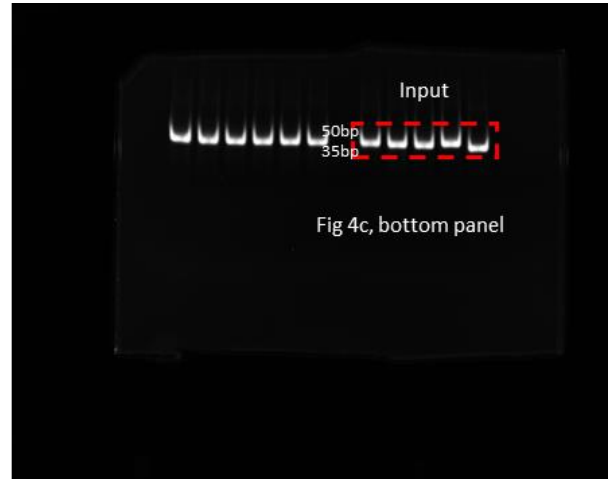

Used in Figure 4c

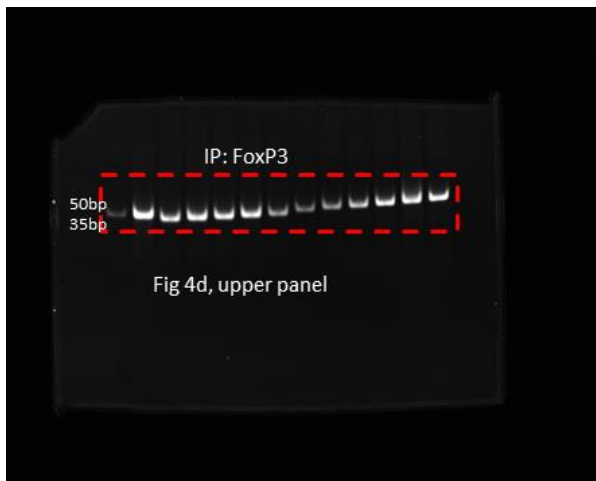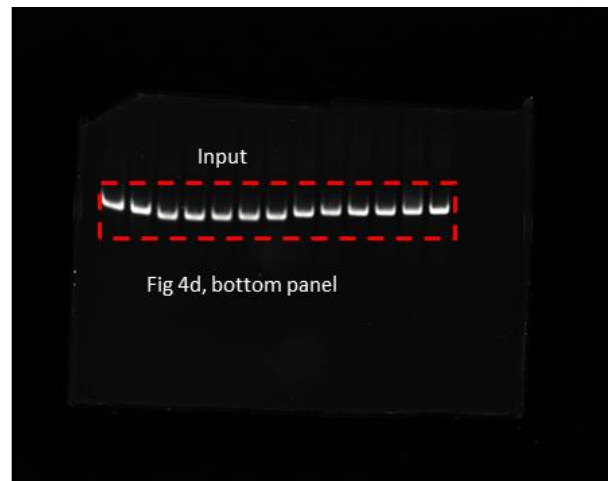

Used in Figure 4d

**For Figure 4**

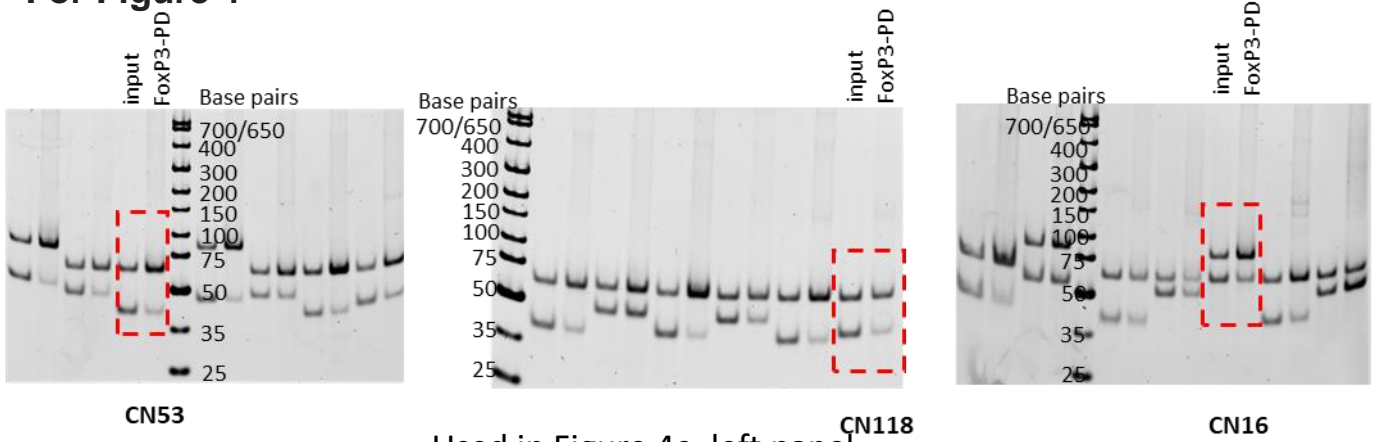

Used in Figure 4e, left panel

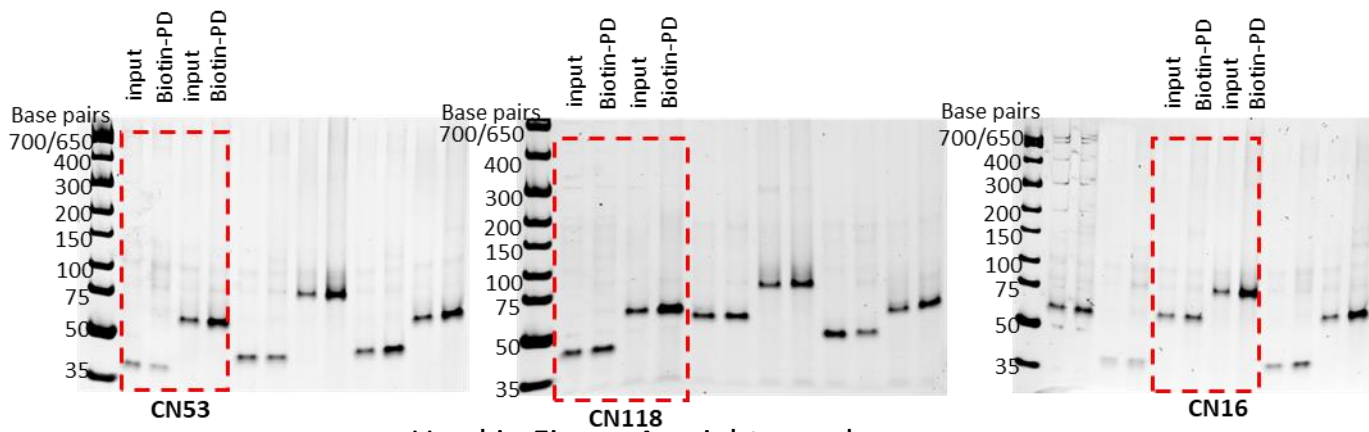

Used in Figure 4e, right panel

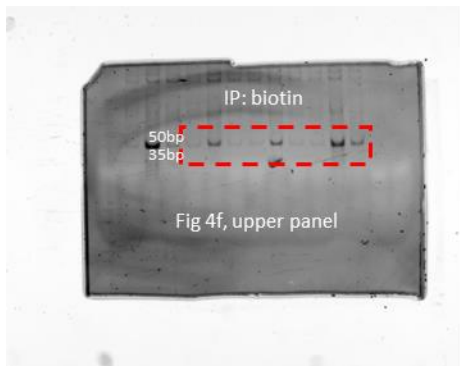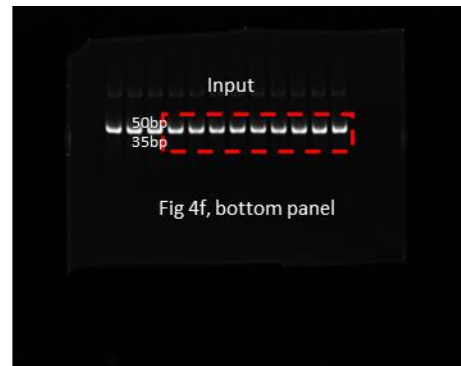

Used in Figure 4f

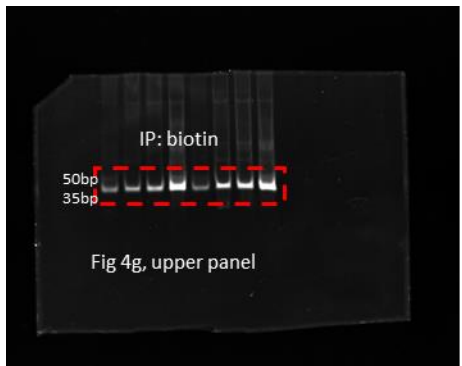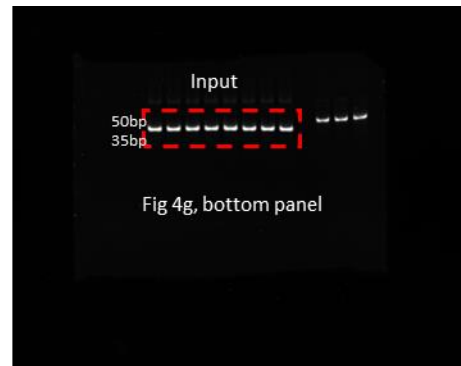

Used in Figure 4g

# For Figure 5 and ED Figure 1

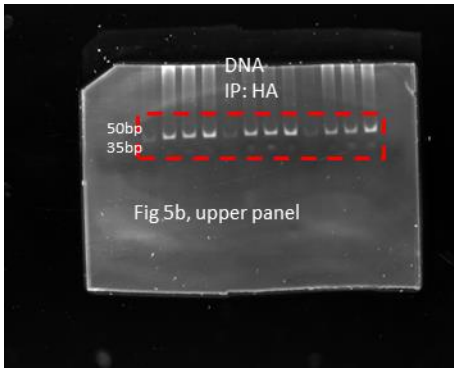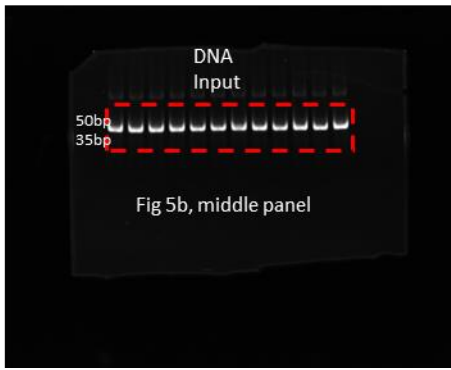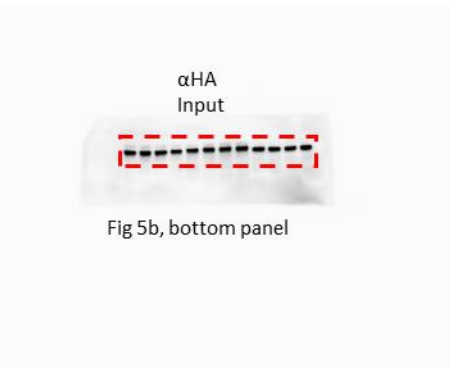

Used in Figure 5b

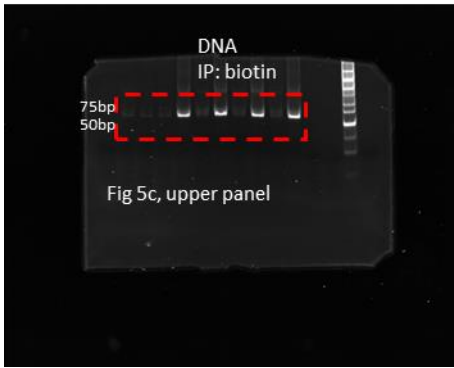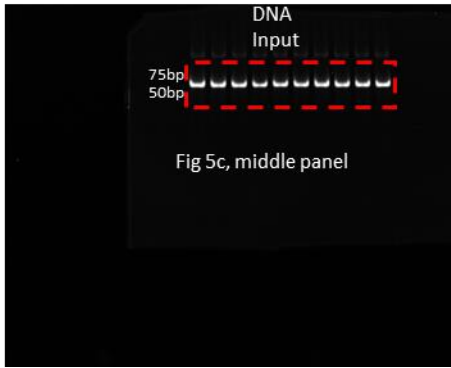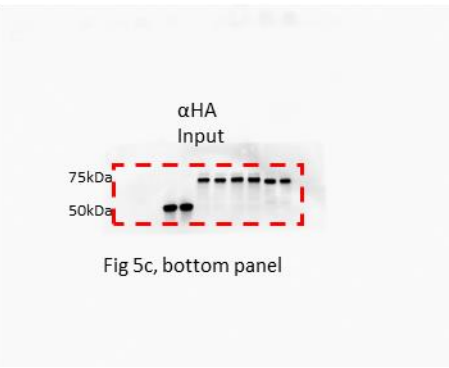

Used in Figure 5c

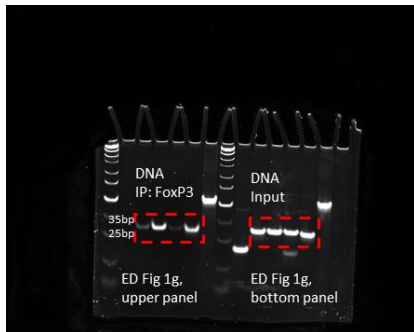

Used in ED Figure 1g

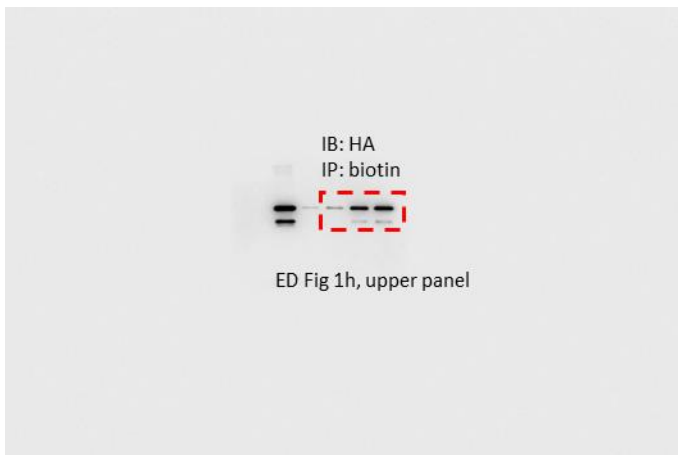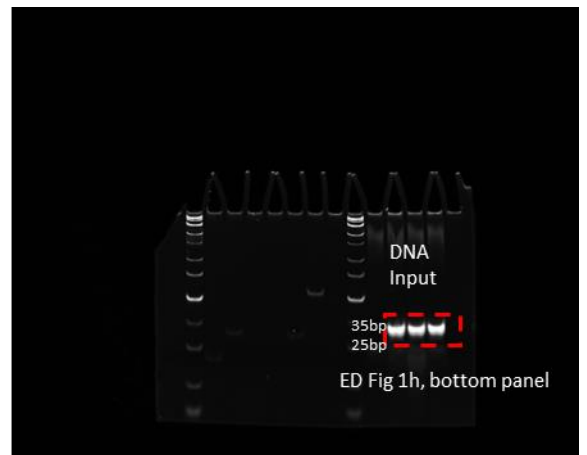

Used in ED Figure 1h

# For ED Figure 1

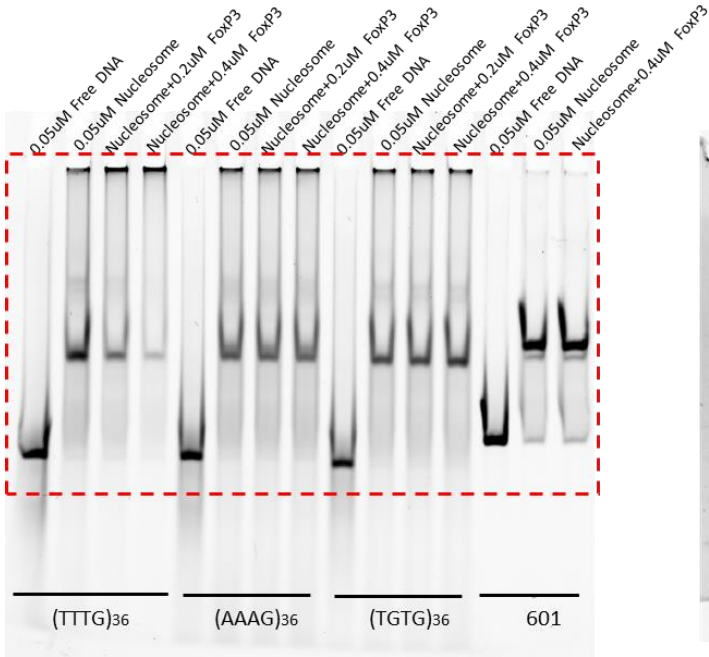

Used in ED Figure 1i

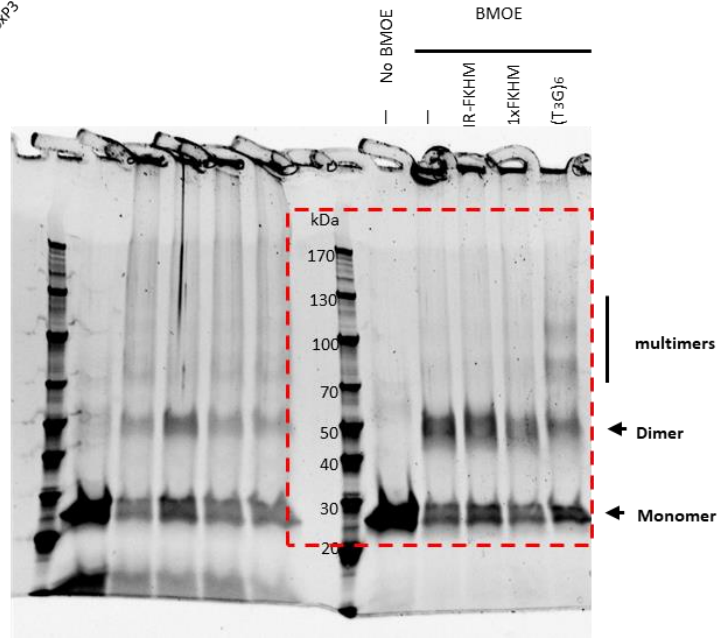

Used in ED Figure 1j

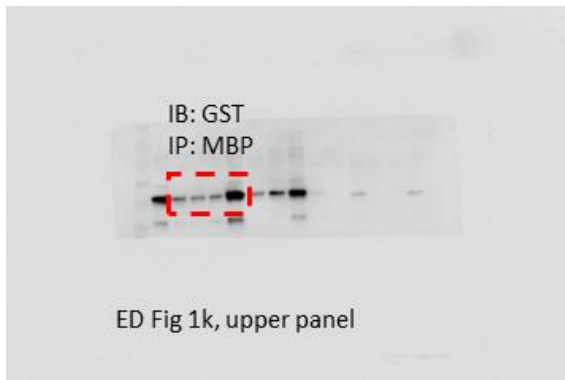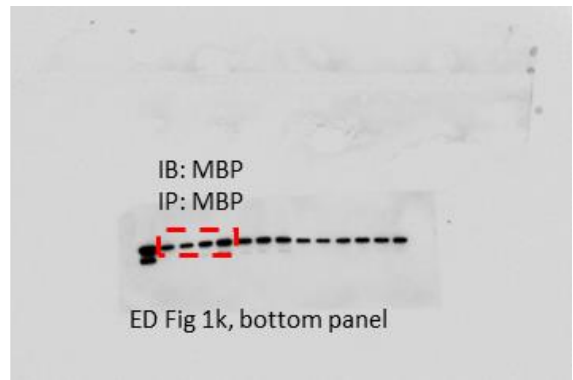

Used in ED Figure 1k



For ED Figure 2 and 3

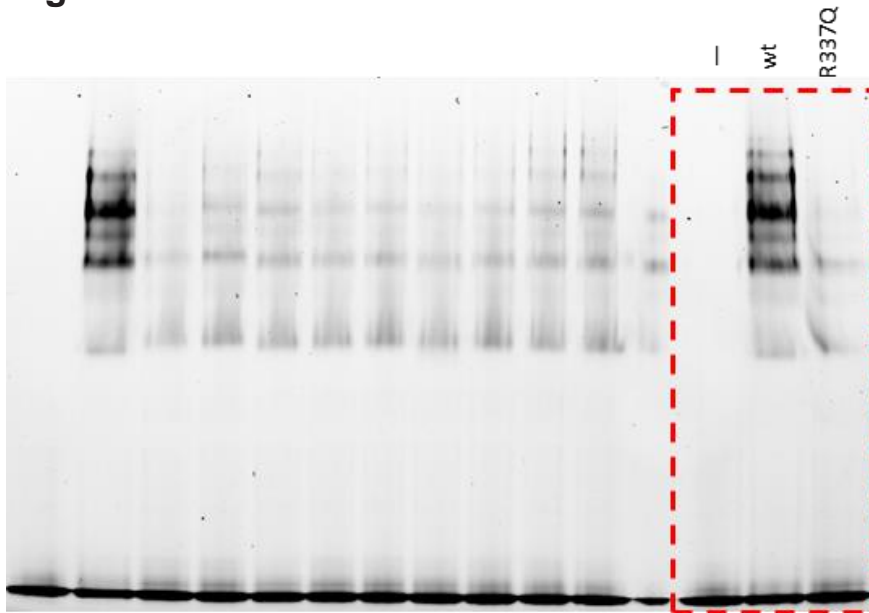

Used in ED Figure 2h

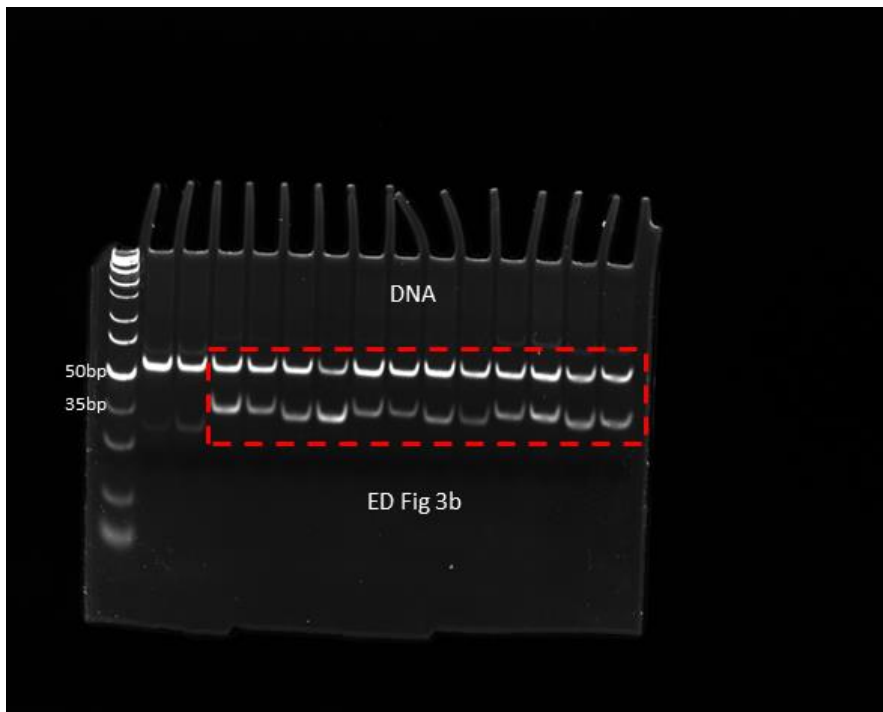

Used in ED Figure 3b

# For ED Figure 3

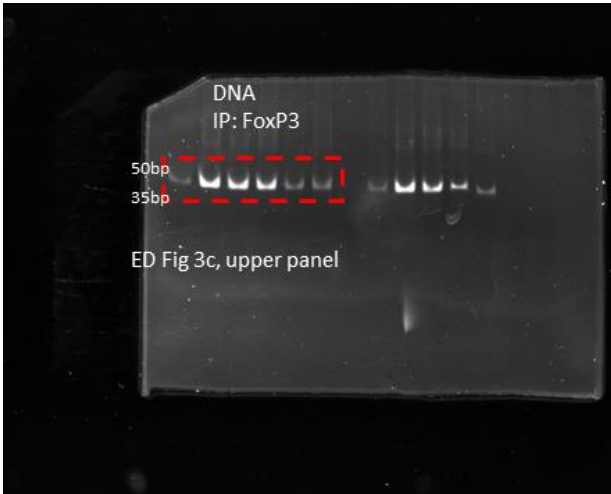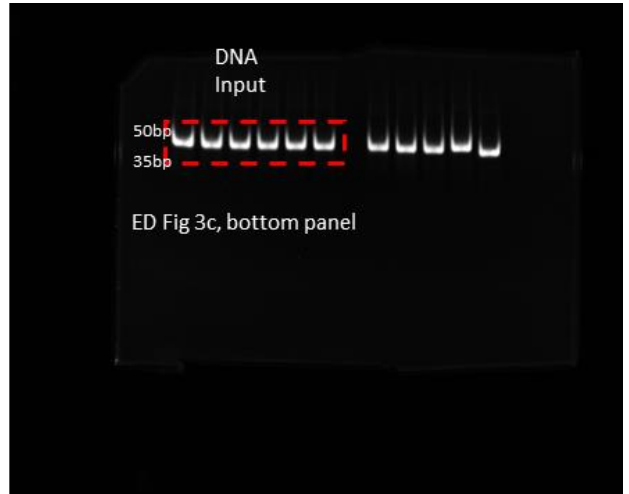

Used in ED Figure 3c

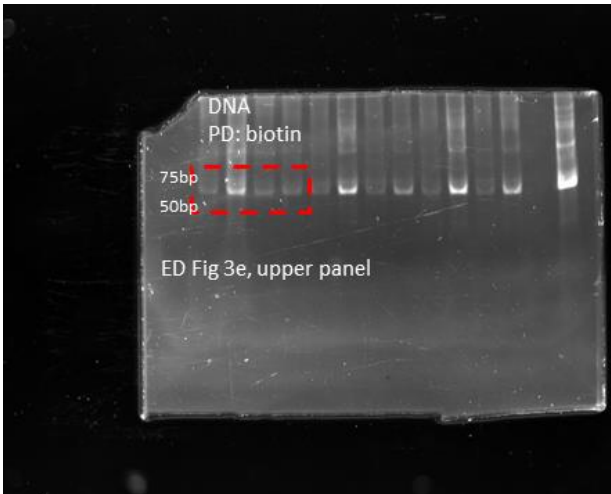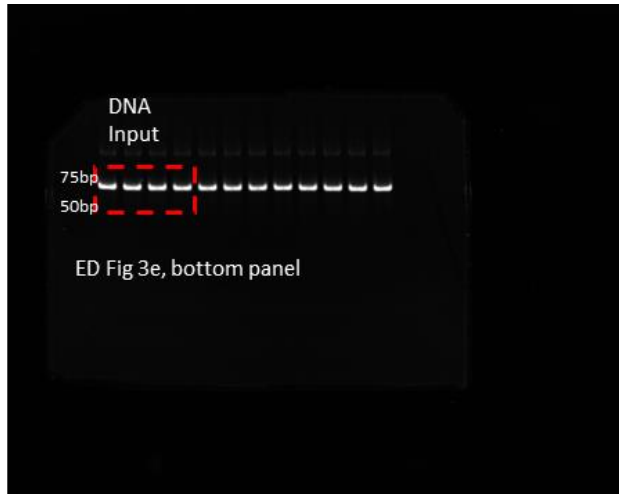

Used in ED Figure 3e

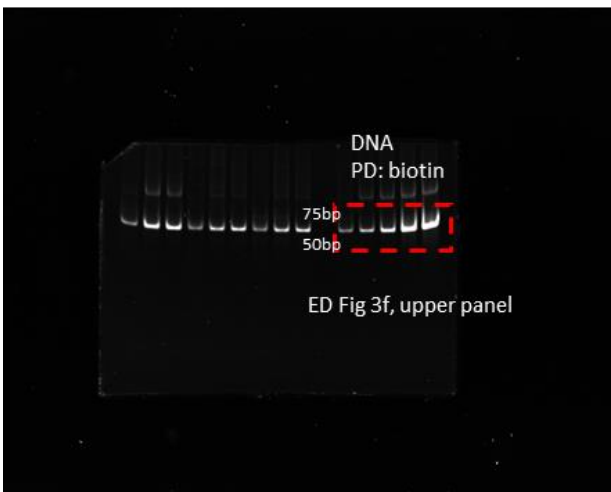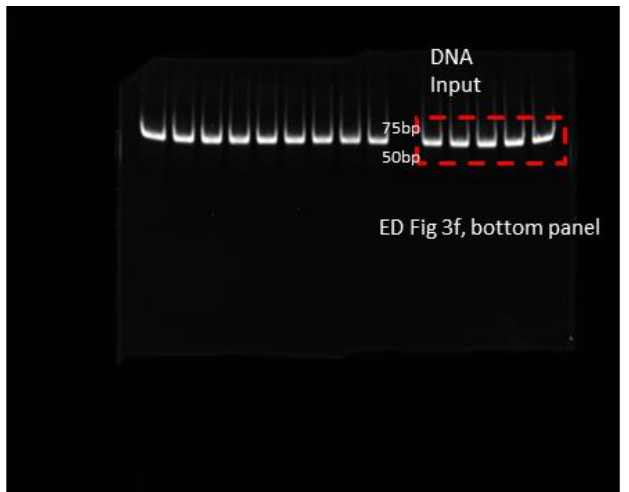

Used in ED Figure 3f

# For ED Figure 5

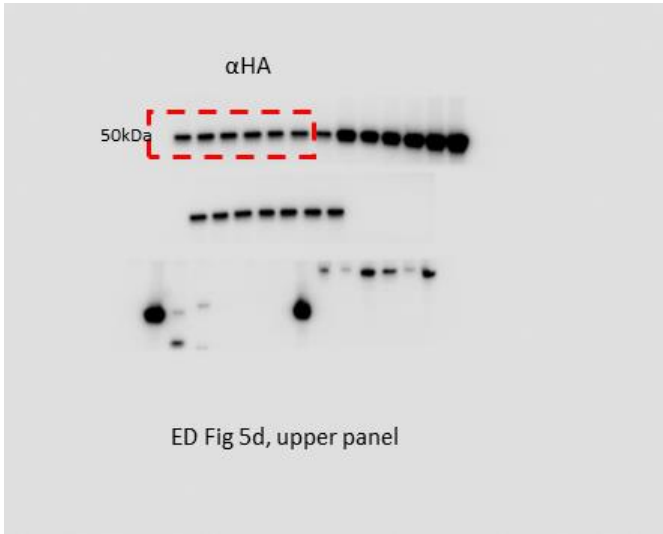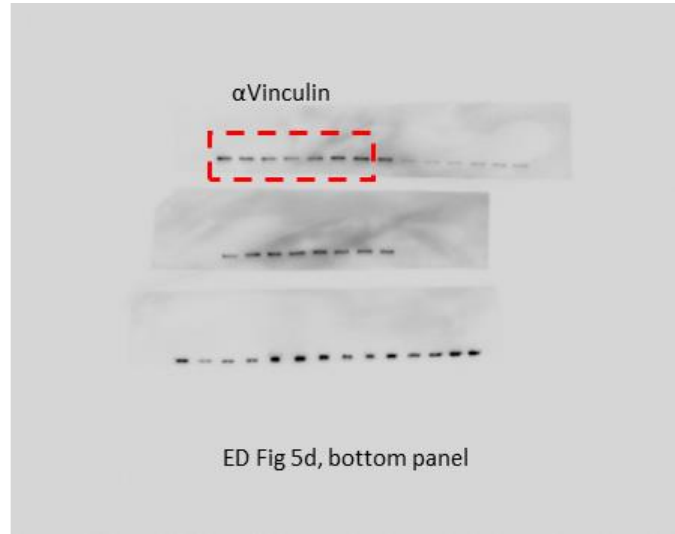

Used in ED Figure 5d

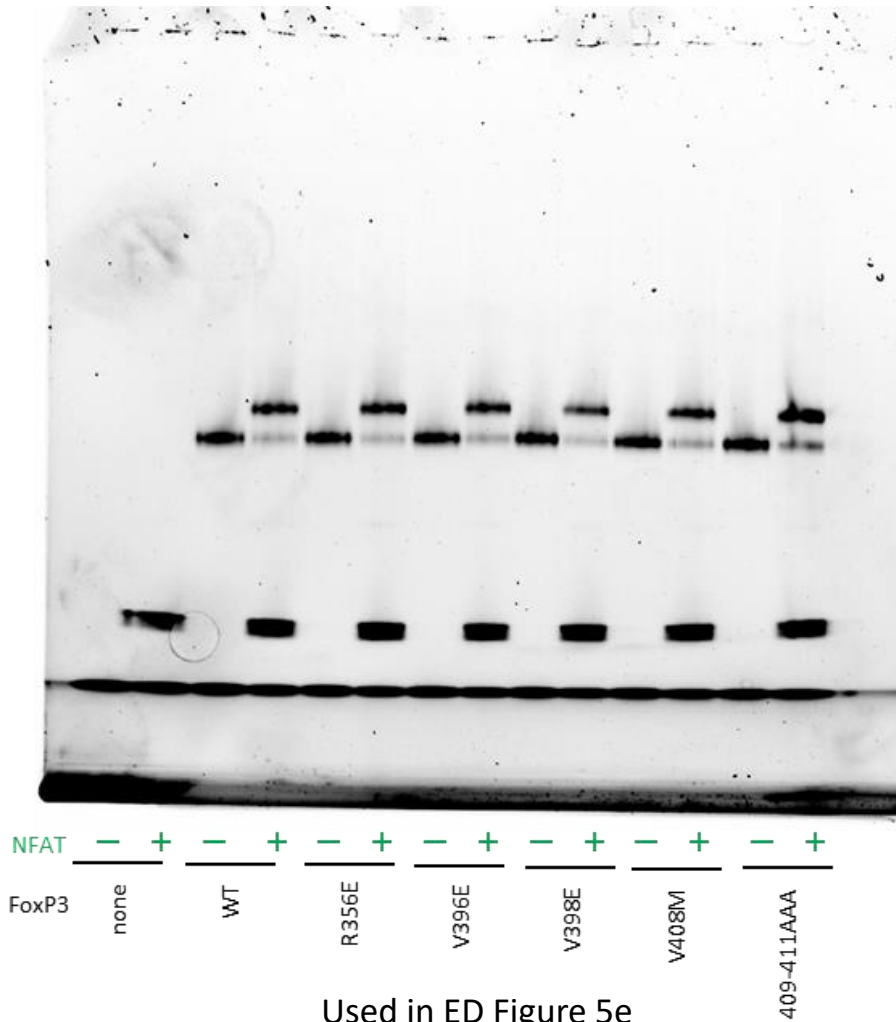

## For ED Figure 6

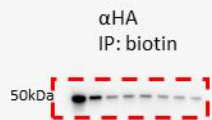

ED Fig 6a, upper panel

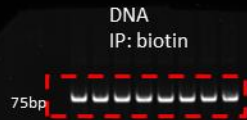

ED Fig 6a, middle panel

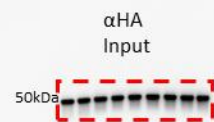

ED Fig 6a, bottom panel

Used in ED Figure 6a

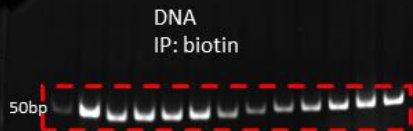

ED Fig 6b, upper panel

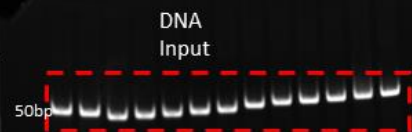

ED Fig 6b, bottom panel

Used in ED Figure 6b

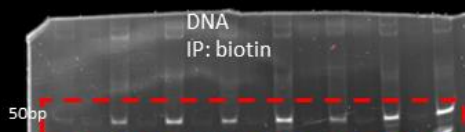

ED Fig 6c, upper panel

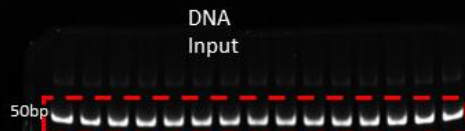

ED Fig 6c, bottom panel

Used in ED Figure 6c

## For ED Figure 6

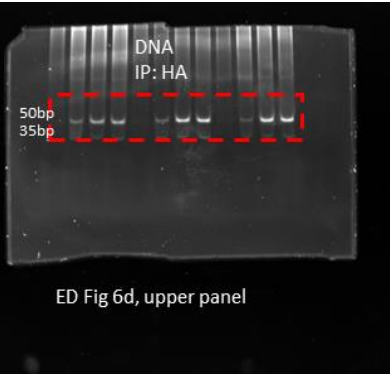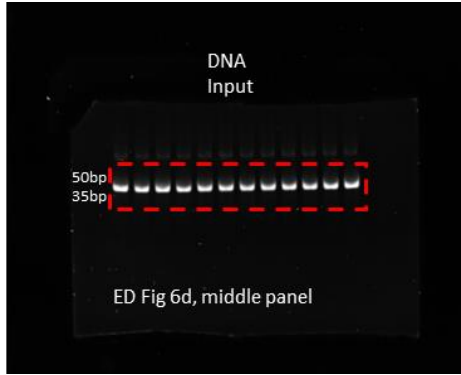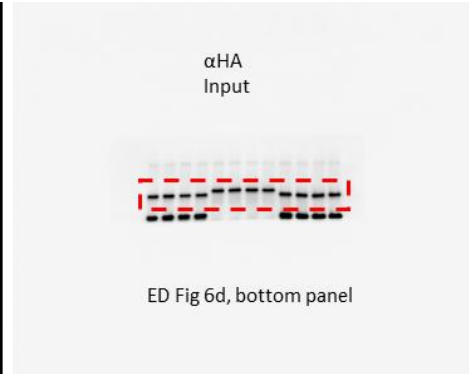

Used in ED Figure 6d

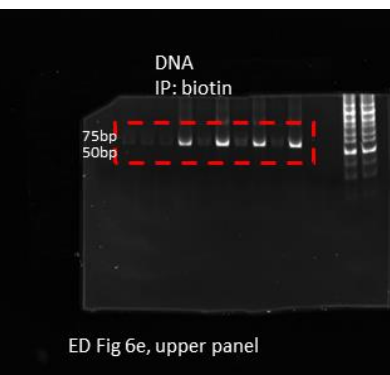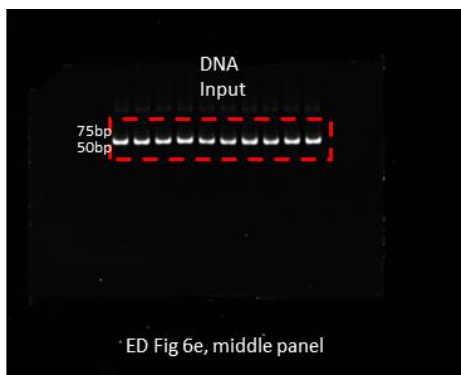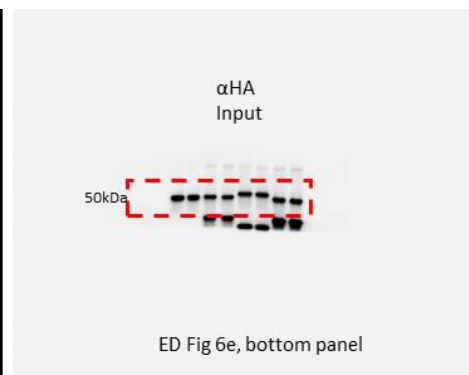

Used in ED Figure 6e

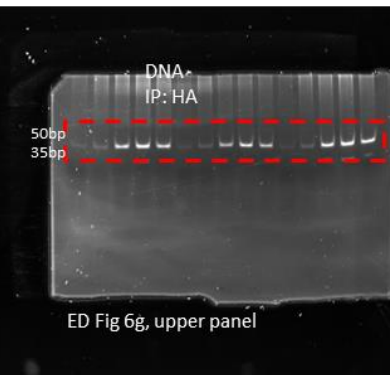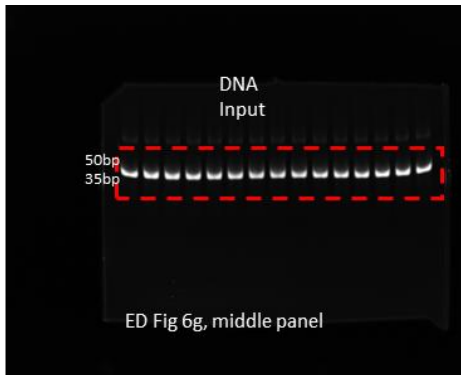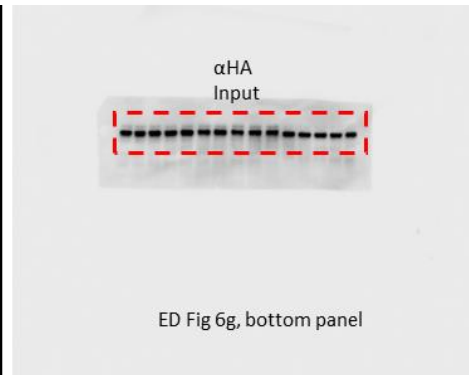

Used in ED Figure 6g

# Supplementary Tables

**Supplementary Table 1.** Summary of FoxP3 binding motifs. 1a, FoxP3 binding motif *in vitro*. 1b, FoxP3 binding motifs *in vivo*. 1c, other FKH TFs' binding motifs.

**Supplementary Table 2.** List of DNA oligos used in this study. 2a, allelic bias sites information. 2b, DNA oligo sequences.

**Supplementary Table 3.** Chromatin contacts at FoxP3-bound anchors. 3a, summary of the contacts with frequency >5 in WT Treg HiC and connected by two TnG anchors. 3b-3f, with an increasing FoxP3 PLAC-seq count threshold (>5, 10, 25, 50, 75 respectively), all the anchor information is displayed. 3g, genomic annotation for the CNR peaks overlapping with PLAC-seq counts above the threshold of 75.
